# Supplementary material
Source: PubMed Central journal article supplement (PMC3776601)
Supplement: NIHMS483236-supplement-01.pdf [file NIHMS483236-supplement-01.pdf]

# **Influence of Mitral Regurgitation Repair on Survival In the Surgical Treatment for Ischemic Heart Failure Trial – SUPPLEMENTAL MATERIAL**

MA Deja et al.

## **Supplemental Methods**

This supplement contains the per-protocol mortality analyses.

Also, baseline treatment of patients with moderate-severe MR is presented.

## **Supplemental Results**

### **Study population**

Of 1212 patients enrolled in the STICH Hypothesis 1 Trial, 435 (36%) were reported to have none or trace MR, 554 (46%) to have mild MR, 181 (15%) to have moderate MR, 39 (3%) to have severe MR at baseline. In 3 patients MR was not assessed.

Among patients with none or trace MR 34 (8%) did not receive their assigned treatment within 12 months of randomization. The number was 61 (11%) in patients with mild MR, 19 (10%) in moderate MR and 6 (15%) in those with severe MR.

Thus 401 patients with none or trace MR, 493 with mild MR, and 195 with moderate-severe MR were available for per-protocol analysis. Supplemental tables 1 and 2 summarize baseline characteristics of patients grouped by MR grade and treatment assignment. As in the intention to treat cohort increasing MR grade was associated with larger LV end-systolic volume index (ESVI), lower LVEF, higher heart failure class and shorter six-minute walk distances.

The therapies at baseline in patients with moderate to severe MR are presented in supplemental table 3 (an intention-to-treat analysis) and supplemental table 4 (per-protocol analysis).

### **Outcome**

Mortality in the patients assigned to MED and treated medically was strongly related to MR severity at baseline (Figure 1). There were 67 deaths (33%) in 203 patients with none or trace MR, 107 (47%) in 227 with mild MR (HR vs. no MR 1.60, 95% CI 1.18–2.18) and 53 (51%) in 104 patients with moderate-severe MR (HR vs. no MR 1.97, 95% CI 1.37–2.83).

Although mortality tended to be lower with surgical treatment at every level of MR, this was only statistically significant in patients with mild MR (Figure 2). Of 266 surgically-treated patients with mild MR, 86 died (32%) (HR vs. MED 0.64, 95%CI 0.48–0.85; P=0.0023).

**Supplemental table 1.** Baseline Characteristics of 1089 patients who received their assignment treatment by Mitral Regurgitation Severity

| Characteristic                               | None or Trace MR (n=401) | Mild MR (n=493) | Moderate-Severe MR (n=195) | P Value |
|----------------------------------------------|--------------------------|-----------------|----------------------------|---------|
| Age, median (25th, 75th), yrs                | 59 (54, 66)              | 60 (54, 68)     | 60 (54, 69)                | 0.207   |
| Male, no. (%)                                | 364 (91)                 | 426 (86)        | 168 (86)                   | 0.095   |
| Previous MI, no. (%)                         | 306 (76)                 | 384 (78)        | 149 (76)                   | 0.833   |
| Hyperlipidaemia, no. (%)                     | 261 (65)                 | 289 (59)        | 111 (57)                   | 0.077   |
| Hypertension, no. (%)                        | 255 (64)                 | 298 (60)        | 111 (57)                   | 0.279   |
| Diabetes, no. (%)                            | 170 (42)                 | 187 (38)        | 78 (40)                    | 0.399   |
| Chronic renal disease, no. (%)               | 32 (8)                   | 33 (7)          | 18 (9)                     | 0.503   |
| Previous stroke, no. (%)                     | 32 (8)                   | 36 (7)          | 16 (8)                     | 0.894   |
| Previous PCI, no. (%)                        | 42 (11)                  | 58 (12)         | 36 (19)                    | 0.018   |
| Previous CABG, no. (%)                       | 10 (3)                   | 11 (2)          | 8 (4)                      | 0.376   |
| Current CCS angina class, no. (%)            |                          |                 |                            | 0.241   |
| 0                                            | 162 (40)                 | 171 (35)        | 77 (40)                    |         |
| 1                                            | 64 (16)                  | 77 (16)         | 29 (15)                    |         |
| 2                                            | 156 (39)                 | 227 (46)        | 77 (40)                    |         |
| 3                                            | 16 (4)                   | 15 (3)          | 10 (5)                     |         |
| 4                                            | 3 (1)                    | 3 (1)           | 2 (1)                      |         |
| Highest NYHA class in last 3 months, no. (%) |                          |                 |                            | <0.001  |
| I                                            | 28 (7)                   | 27 (6)          | 10 (5)                     |         |
| II                                           | 170 (42)                 | 175 (36)        | 57 (29)                    |         |
| III                                          | 158 (39)                 | 227 (46)        | 90 (46)                    |         |
| IV                                           | 45 (11)                  | 64 (13)         | 38 (20)                    |         |
| Region, no. (%)                              |                          |                 |                            | <0.001  |
| Europe                                       | 191 (48)                 | 298 (60)        | 103 (53)                   |         |
| US and Canada                                | 88 (22)                  | 103 (21)        | 33 (17)                    |         |

|                                                                      |                |                |                |        |
|----------------------------------------------------------------------|----------------|----------------|----------------|--------|
| Other                                                                | 122 (30)       | 92 (19)        | 59 (30)        |        |
| Risk at randomization                                                | 8 (3, 16)      | 11 (5, 19)     | 17 (10, 24)    | <0·001 |
| CAD distribution, no. of vessel stenosed<br>(75% criterion), no. (%) |                |                |                | 0·588  |
| 1                                                                    | 102 (25)       | 125 (25)       | 46 (24)        |        |
| 2                                                                    | 163 (41)       | 179 (36)       | 76 (39)        |        |
| 3                                                                    | 136 (34)       | 189 (38)       | 73 (37)        |        |
| Left main ( $\geq 50\%$ stenosis), no. (%)                           | 7 (2)          | 15 (3)         | 6 (3)          | 0·422  |
| Proximal LAD ( $\geq 75\%$ stenosis), no. (%)                        | 294 (73)       | 332 (67)       | 118 (61)       | 0·006  |
| Duke CAD index, median (25th, 75th), 0–<br>100                       | 65 (39, 77)    | 65 (39, 77)    | 52 (39, 77)    | 0·502  |
| LV ejection fraction, median (25th, 75th), %                         | 29 (23, 35)    | 27 (21, 33)    | 25 (20, 32)    | <0·001 |
| ESVI, median (25th, 75th), mL/m <sup>2</sup>                         | 72 (57, 93)    | 81 (61, 101)   | 88 (65, 121)   | <0·001 |
| Six-minute walk test                                                 |                |                |                |        |
| Able to perform, no. (%)                                             | 339 (85)       | 436 (88)       | 168 (87)       | 0·310  |
| Distance walked, median (25th, 75th),<br>m                           | 350 (290, 420) | 340 (356, 409) | 333 (255, 400) | 0·040  |

---

Abbreviations: CABG, coronary artery bypass grafting; CAD, coronary artery disease; CCS, Canadian Cardiovascular Society; ESVI, end-systolic volume index; LAD, left anterior descending; MED, medical therapy; MI, myocardial infarction; MR, mitral regurgitation; NYHA, New York Heart Association; PCI, percutaneous coronary intervention.

**Supplemental table 2: Baseline Characteristics of 1089 Patients who received their assigned treatment by Mitral Regurgitation Severity and Randomized Treatment Assignment**

| Characteristic                                  | <u>None or Trace MR</u> |                | <u>Mild MR</u> |                | <u>Moderate-Severe MR</u> |                |
|-------------------------------------------------|-------------------------|----------------|----------------|----------------|---------------------------|----------------|
|                                                 | <b>MED</b>              | <b>CABG</b>    | <b>MED</b>     | <b>CABG</b>    | <b>MED</b>                | <b>CABG</b>    |
|                                                 | <b>(n=203)</b>          | <b>(n=198)</b> | <b>(n=227)</b> | <b>(n=266)</b> | <b>(n=104)</b>            | <b>(n=91)</b>  |
| Age, median (25th, 75th), yrs                   | 59<br>(63, 66)          | 60<br>(54, 67) | 59<br>(54, 68) | 60<br>(53, 68) | 59<br>(53, 69)            | 62<br>(55, 69) |
| Male, no. (%)                                   | 185(91)                 | 179 (90)       | 198 (87)       | 228 (86)       | 87 (84)                   | 81 (89)        |
| Previous MI, no. (%)                            | 160(79)                 | 146 (74)       | 180 (79)       | 204 (77)       | 78 (75)                   | 71 (78)        |
| Hyperlipidaemia, no. (%)                        | 132(65)                 | 129 (65)       | 138 (61)       | 151 (57)       | 57 (55)                   | 54 (60)        |
| Hypertension, no. (%)                           | 131 (65)                | 124 (63)       | 142 (63)       | 156 (59)       | 61 (59)                   | 50 (55)        |
| Diabetes, no. (%)                               | 88 (43)                 | 82 (41)        | 87 (38)        | 100 (38)       | 42 (40)                   | 36 (40)        |
| Chronic renal disease, no. (%)                  | 15 (7)                  | 17 (9)         | 16 (7)         | 17 (6)         | 11 (11)                   | 7 (8)          |
| Previous stroke, no. (%)                        | 11 (5)                  | 21 (11)        | 17 (8)         | 19 (7)         | 8 (8)                     | 8 (9)          |
| Previous PCI, no. (%)                           | 19 (9)                  | 23 (12)        | 29 (13)        | 29 (11)        | 18 (17)                   | 18 (20)        |
| Previous CABG, no. (%)                          | 4 (2)                   | 6 (3)          | 5 (2)          | 6 (2)          | 4 (4)                     | 4 (4)          |
| Current CCS angina class,<br>no. (%)            |                         |                |                |                |                           |                |
| 0                                               | 84 (41)                 | 78 (39)        | 84 (37)        | 87 (33)        | 41 (39)                   | 36 (40)        |
| 1                                               | 36 (18)                 | 28 (14)        | 26 (12)        | 51 (19)        | 21 (20)                   | 8 (9)          |
| 2                                               | 74 (37)                 | 82 (41)        | 110 (49)       | 117 (44)       | 37 (36)                   | 40 (44)        |
| 3                                               | 9 (4)                   | 7 (4)          | 4 (2)          | 11 (4)         | 5 (5)                     | 5 (6)          |
| 4                                               | 0 (0)                   | 3 (2)          | 3 (1)          | 0 (0)          | 0 (0)                     | 2 (2)          |
| Highest NYHA class in last 3<br>months, no. (%) |                         |                |                |                |                           |                |
| I                                               | 16 (8)                  | 12 (6)         | 15 (7)         | 12 (5)         | 6 (6)                     | 4 (4)          |
| II                                              | 88 (43)                 | 82 (41)        | 74 (33)        | 101 (38)       | 30 (29)                   | 27 (30)        |
| III                                             | 82 (40)                 | 76 (38)        | 106 (47)       | 121 (46)       | 46 (44)                   | 44 (48)        |

|                                    |            |            |            |            |             |            |
|------------------------------------|------------|------------|------------|------------|-------------|------------|
| IV                                 | 17 (8)     | 28 (14)    | 32 (14)    | 132 (12)   | 22 (21)     | 16 (18)    |
| Region, no. (%)                    |            |            |            |            |             |            |
| Europe                             | 100 (49)   | 91 (46)    | 138 (61)   | 160 (60)   | 55 (53)     | 48 (53)    |
| US and Canada                      | 46 (23)    | 42 (21)    | 45 (20)    | 58 (22)    | 16 (15)     | 17 (19)    |
| Other                              | 57 (28)    | 65 (33)    | 44 (19)    | 48 (18)    | 33 (32)     | 26 (29)    |
| Risk at randomization,             | 8          | 8          | 12         | 11         | 17          | 17         |
| median (25th, 75th)                | (3, 16)    | (3, 16)    | (5, 20)    | (6, 19)    | (9, 24)     | (11, 23)   |
| CAD distribution, no. of           |            |            |            |            |             |            |
| vessel stenosed ( $\geq 75\%$ ),   |            |            |            |            |             |            |
| no. (%)                            |            |            |            |            |             |            |
| 1                                  | 50 (25)    | 52 (26)    | 64 (28)    | 61 (23)    | 25(24)      | 21 (23)    |
| 2                                  | 86 (42)    | 77 (39)    | 78 (34)    | 101 (38)   | 41 (39)     | 35 (39)    |
| 3                                  | 67 (33)    | 69 (35)    | 85 (37)    | 104 (39)   | 38 (37)     | 35 (39)    |
| Left main ( $\geq 50\%$ stenosis), | 4 (2)      | 3 (2)      | 5 (2)      | 10 (4)     | 3 (3)       | 3 (3)      |
| no. (%)                            |            |            |            |            |             |            |
| Proximal LAD ( $\geq 75\%$         | 150 (74)   | 144 (73)   | 153 (67)   | 179 (67)   | 63 (61)     | 55 (60)    |
| stenosis), no. (%)                 |            |            |            |            |             |            |
| Duke CAD index, median             | 65         | 52         | 65         | 65         | 52          | 59         |
| (25th, 75th), 0–100                | (39, 77)   | (39, 77)   | (39, 77)   | (39, 77)   | (39, 77)    | (39, 77)   |
| LV ejection fraction, median       | 30         | 27         | 26         | 27         | 25          | 26         |
| (25th, 75th), %                    | (24, 35)   | (22, 34)   | (21, 34)   | (22, 32)   | (20, 32)    | (20, 31)   |
| ESVI, median (25th, 75th),         | 72         | 71         | 83         | 80         | 90 (67,122) | 85         |
| mL/m <sup>2</sup>                  | (57, 90)   | (57, 99)   | (57,108)   | (64, 98)   |             | (63,121)   |
| Six-minute walk test               |            |            |            |            |             |            |
| Able to perform, no. (%)           | 178 (89)   | 161 (81)   | 203 (89)   | 233(88)    | 93 (89)     | 75 (83)    |
| Distance walked, median            | 350        | 350        | 330        | 350        | 340         | 333        |
| (25th, 75th), m                    | (291, 423) | (280, 417) | (255, 412) | (259, 401) | (255, 400)  | (255, 399) |

Abbreviations: CABG, coronary artery bypass grafting; CAD, coronary artery disease; CCS, Canadian Cardiovascular Society; ESVI, end-systolic volume index; LAD, left anterior descending; LV, left ventricular; MED, medical therapy; MI, myocardial infarction; MR, mitral regurgitation; NYHA, New York Heart Association; PCI, percutaneous coronary intervention.

**Supplemental table 3** Therapies at baseline in patients with moderate/severe MR as randomized.

|                          | <b>MED</b><br><b>(n = 116)</b> | <b>CABG Only</b><br><b>(n = 55)</b> | <b>CABG + MVRep</b><br><b>(n = 49)</b> |
|--------------------------|--------------------------------|-------------------------------------|----------------------------------------|
| ICD                      | 3 (2.6%)                       | 3 (5.5%)                            | 2 (4.1%)                               |
| Pacemaker for heart rate | 5 (4.3%)                       | 0 (0%)                              | 1 (2.0%)                               |
| Pacemaker (CRT)          | 1 (0.9%)                       | 0 (0%)                              | 0 (0%)                                 |
| Beta-Blocker*            | 103 (89%)                      | 42 (76%)                            | 44 (90%)                               |
| ACE Inhibitor            | 93 (80%)                       | 45 (82%)                            | 43 (88%)                               |
| ACE Inhibitor or ARB     | 103 (89%)                      | 50 (91%)                            | 46 (94%)                               |
| Statin                   | 97 (84%)                       | 43 (78%)                            | 43 (88%)                               |
| Aspirin                  | 96 (83%)                       | 42 (76%)                            | 38 (78%)                               |
| Aspirin or Warfarin*     | 106 (91%)                      | 45 (82%)                            | 39 (80%)                               |
| Clopidogrel*             | 25 (22%)                       | 15 (27%)                            | 5 (10%)                                |
| Digoxin                  | 34 (29%)                       | 19 (35%)                            | 18 (37%)                               |
| Diuretic                 | 99 (85%)                       | 44 (80%)                            | 45 (92%)                               |
| Nitrate                  | 58 (50%)                       | 29 (53%)                            | 28 (57%)                               |

Abbreviations: ACE, angiotensin converting enzyme, ARB, aldosterone receptor blocker, CABG, coronary artery bypass grafting; CRT, cardiac resynchronization therapy; ICD, implantable cardioverter defibrillator; MED, medical therapy; MR, mitral regurgitation.

\*0.05 < p < 0.10. P > 0.10 for all other comparisons

**Supplemental table 4** Therapies at baseline in patients with moderate/severe MR per protocol.

|                          | <b>MED</b><br><b>(n = 104)</b> | <b>CABG Only</b><br><b>(n = 42)</b> | <b>CABG + MVRep</b><br><b>(n = 49)</b> |
|--------------------------|--------------------------------|-------------------------------------|----------------------------------------|
| ICD                      | 3 (2.9%)                       | 2 (4.8%)                            | 2 (4.1%)                               |
| Pacemaker for heart rate | 5 (4.8%)                       | 0 (0%)                              | 1 (2.0%)                               |
| Pacemaker (CRT)          | 1 (1.0%)                       | 0 (0%)                              | 0 (0%)                                 |
| Beta-Blocker             | 91 (88%)                       | 32 (76%)                            | 44 (90%)                               |
| ACE Inhibitor            | 84 (81%)                       | 35 (83%)                            | 43 (88%)                               |
| ACE Inhibitor or ARB     | 94 (90%)                       | 39 (93%)                            | 46 (94%)                               |
| Statin                   | 87 (84%)                       | 33 (79%)                            | 43 (88%)                               |
| Aspirin                  | 85 (82%)                       | 32 (76%)                            | 38 (78%)                               |
| Aspirin or Warfarin*     | 95 (91%)                       | 34 (81%)                            | 39 (80%)                               |
| Clopidogrel*             | 23 (22%)                       | 12 (29%)                            | 5 (10%)                                |
| Digoxin                  | 31 (30%)                       | 16 (38%)                            | 18 (37%)                               |
| Diuretic                 | 88 (85%)                       | 35 (83%)                            | 45 (92%)                               |
| Nitrate                  | 52 (50%)                       | 25 (60%)                            | 28 (57%)                               |

Abbreviations: ACE, angiotensin converting enzyme, ARB, aldosterone receptor blocker, CABG, coronary artery bypass grafting; CRT, cardiac resynchronization therapy; ICD, implantable cardioverter defibrillator; MED, medical therapy; MR, mitral regurgitation.

\*0.05 < p < 0.10. P > 0.10 for all other comparisons

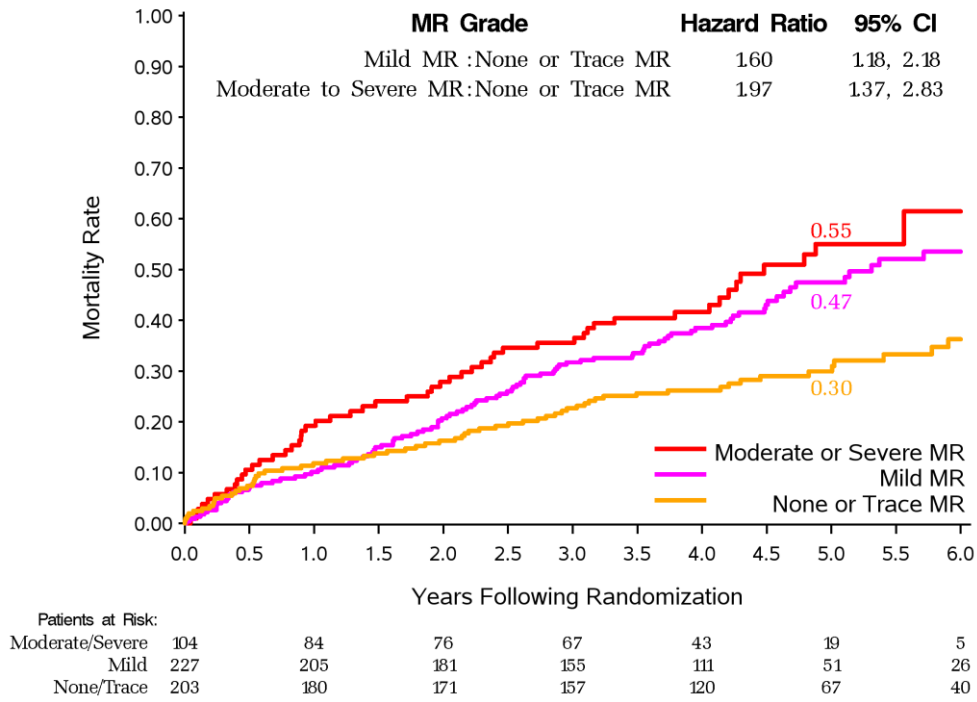

**Figure 1.** Kaplan-Meier estimates of death from any cause among patients assigned to and treated with MED. Separate curves for patients with site-reported none or trace, mild, and moderate-severe MR are presented.



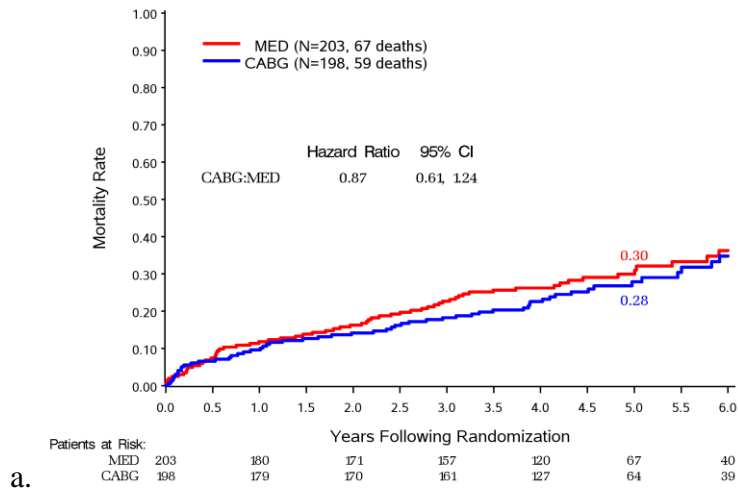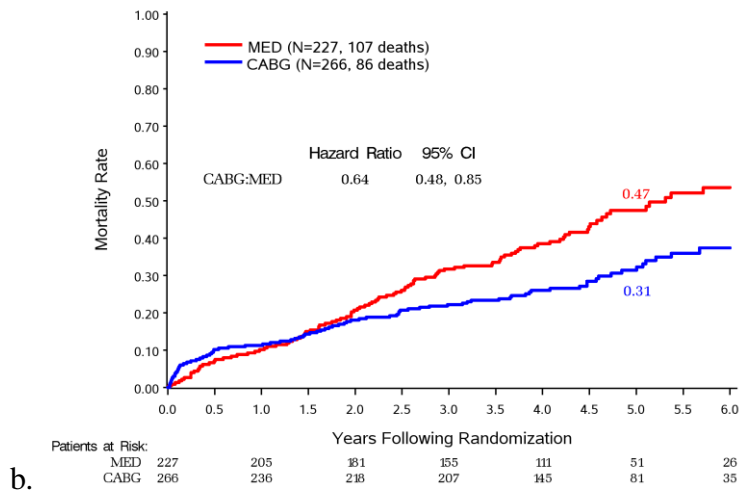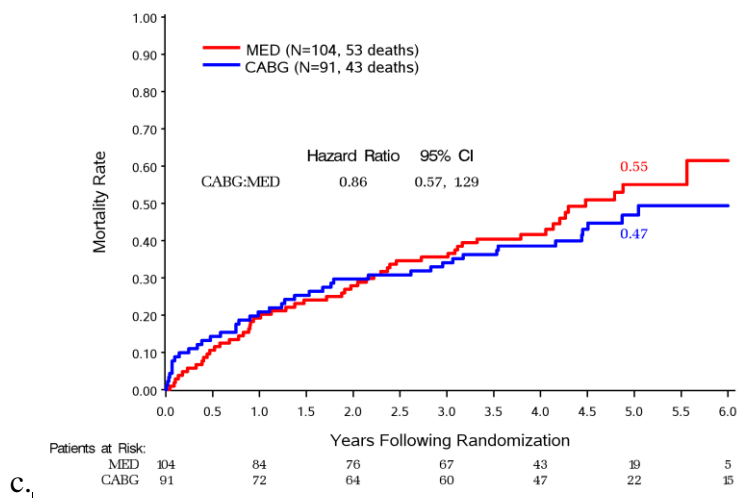

**Figure 2.** Kaplan-Meier estimates of death from any cause in patients assigned to and treated with MED or MED and CABG with site-reported none or trace MR at baseline (a), mild MR at baseline (b), moderate-severe MR at baseline (c).
